# Supplementary material
Source: PubMed Central journal article supplement (PMC3099716)

Supplementary Fig. S1. Internal juxta-nuclear FLAG- $\beta_1$ AR signal co-localizes with Golgi marker TGN46. Merged image of fields from Fig. 5A. FLAG signal is red, TGN46 signal is green and overlap is yellow.

Supplementary figure S1

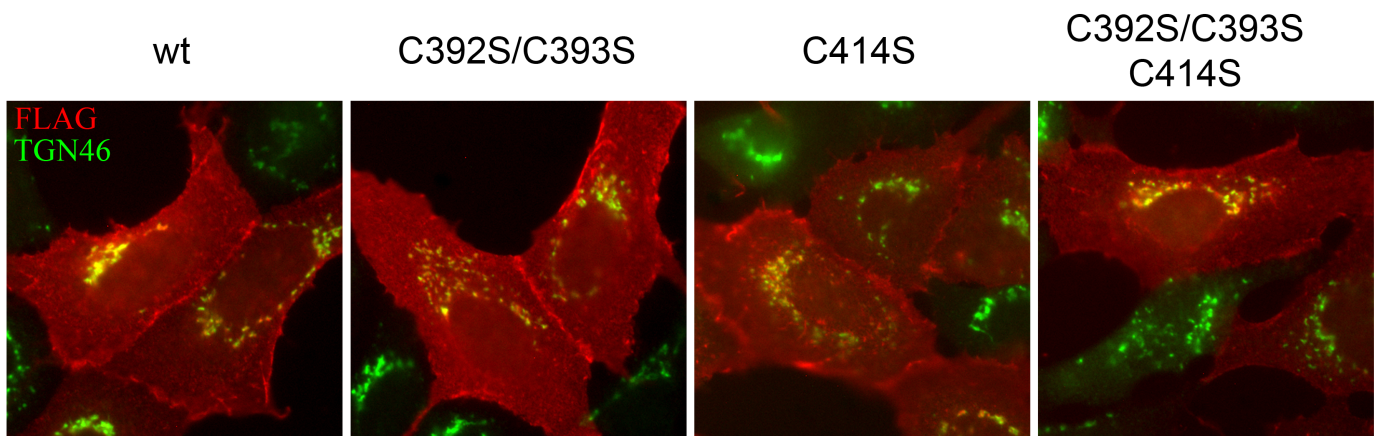

Supplement: supp_M110.189977_jbc.M110.189977-1.pdf [file supp_M110.189977_jbc.M110.189977-1.pdf]
